# Supplementary material
Source: ML conference proceedings conference paper supplement (https://proceedings.neurips.cc/paper_files/paper/2022/hash/46a126492ea6fb87410e55a58df2e189-Abstract.html)
Supplement: Supplementary file 1 [file 46a126492ea6fb87410e55a58df2e189-Supplemental-Conference.zip]

Archive with 3 entries (2 files):
- neurips_2022_FINAL_supplementary/
- neurips_2022_FINAL_supplementary/sparse_shifts_paper_neurips_2023_FINAL_appendix.pdf
- __MACOSX/neurips_2022_FINAL_supplementary/._sparse_shifts_paper_neurips_2023_FINAL_appendix.pdf
